# Supplementary material for: Enhanced Performance of Sn@Pt Core-Shell Nanocatalysts Supported on Two Different Carbon Structures for the Hydrogen Oxidation Reaction in Acid Media
Source: Hindawi journal article supplement (doi:10.1155/2022/2982594), 2022-09-13
Supplement: f1 [file 2982594.f1.docx]

Enhanced performance of Sn@Pt core-shell nanocatalysts supported on two different carbon structures for the Hydrogen Oxidation Reaction in acid media

G. Hernández-Vázquez1, F.J. Rodríguez-Varela1, S. Dessources2, B. Escobar-Morales3, Aruna K. Kunhiraman4, M.A. Garcia-Lobato5, I.L. Alonso-Lemus6

1Sustentabilidad de los Recursos Naturales y Energía, Cinvestav Unidad Saltillo, Av. Industria Metalúrgica 1062, Parque Industrial Saltillo-Ramos Arizpe, C.P. 25900, Ramos Arizpe, Coah., México.

2Laboratoire des Sciences pour l’Environnement et l’Énergie (LS2E), École Normale Supérieure, Haiti.

3CONACyT, Centro de Investigación Científica de Yucatán, Km. 5.5 Carr. Sierra Papacal‑Chuburná Puerto. Tablaje 31257, Sierra Papacal, Yucatán 97302, México.

4Rathinam Research Center, Rathinam Technical Campus, Coimbatore - 641021, Tamilnadu, India.

5Facultad de Ciencias Químicas, Universidad Autónoma de Coahuila, C.P. 25280, Saltillo, Coahuila, México.

6CONACyT, Sustentabilidad de los Recursos Naturales y Energía, Cinvestav Unidad Saltillo.


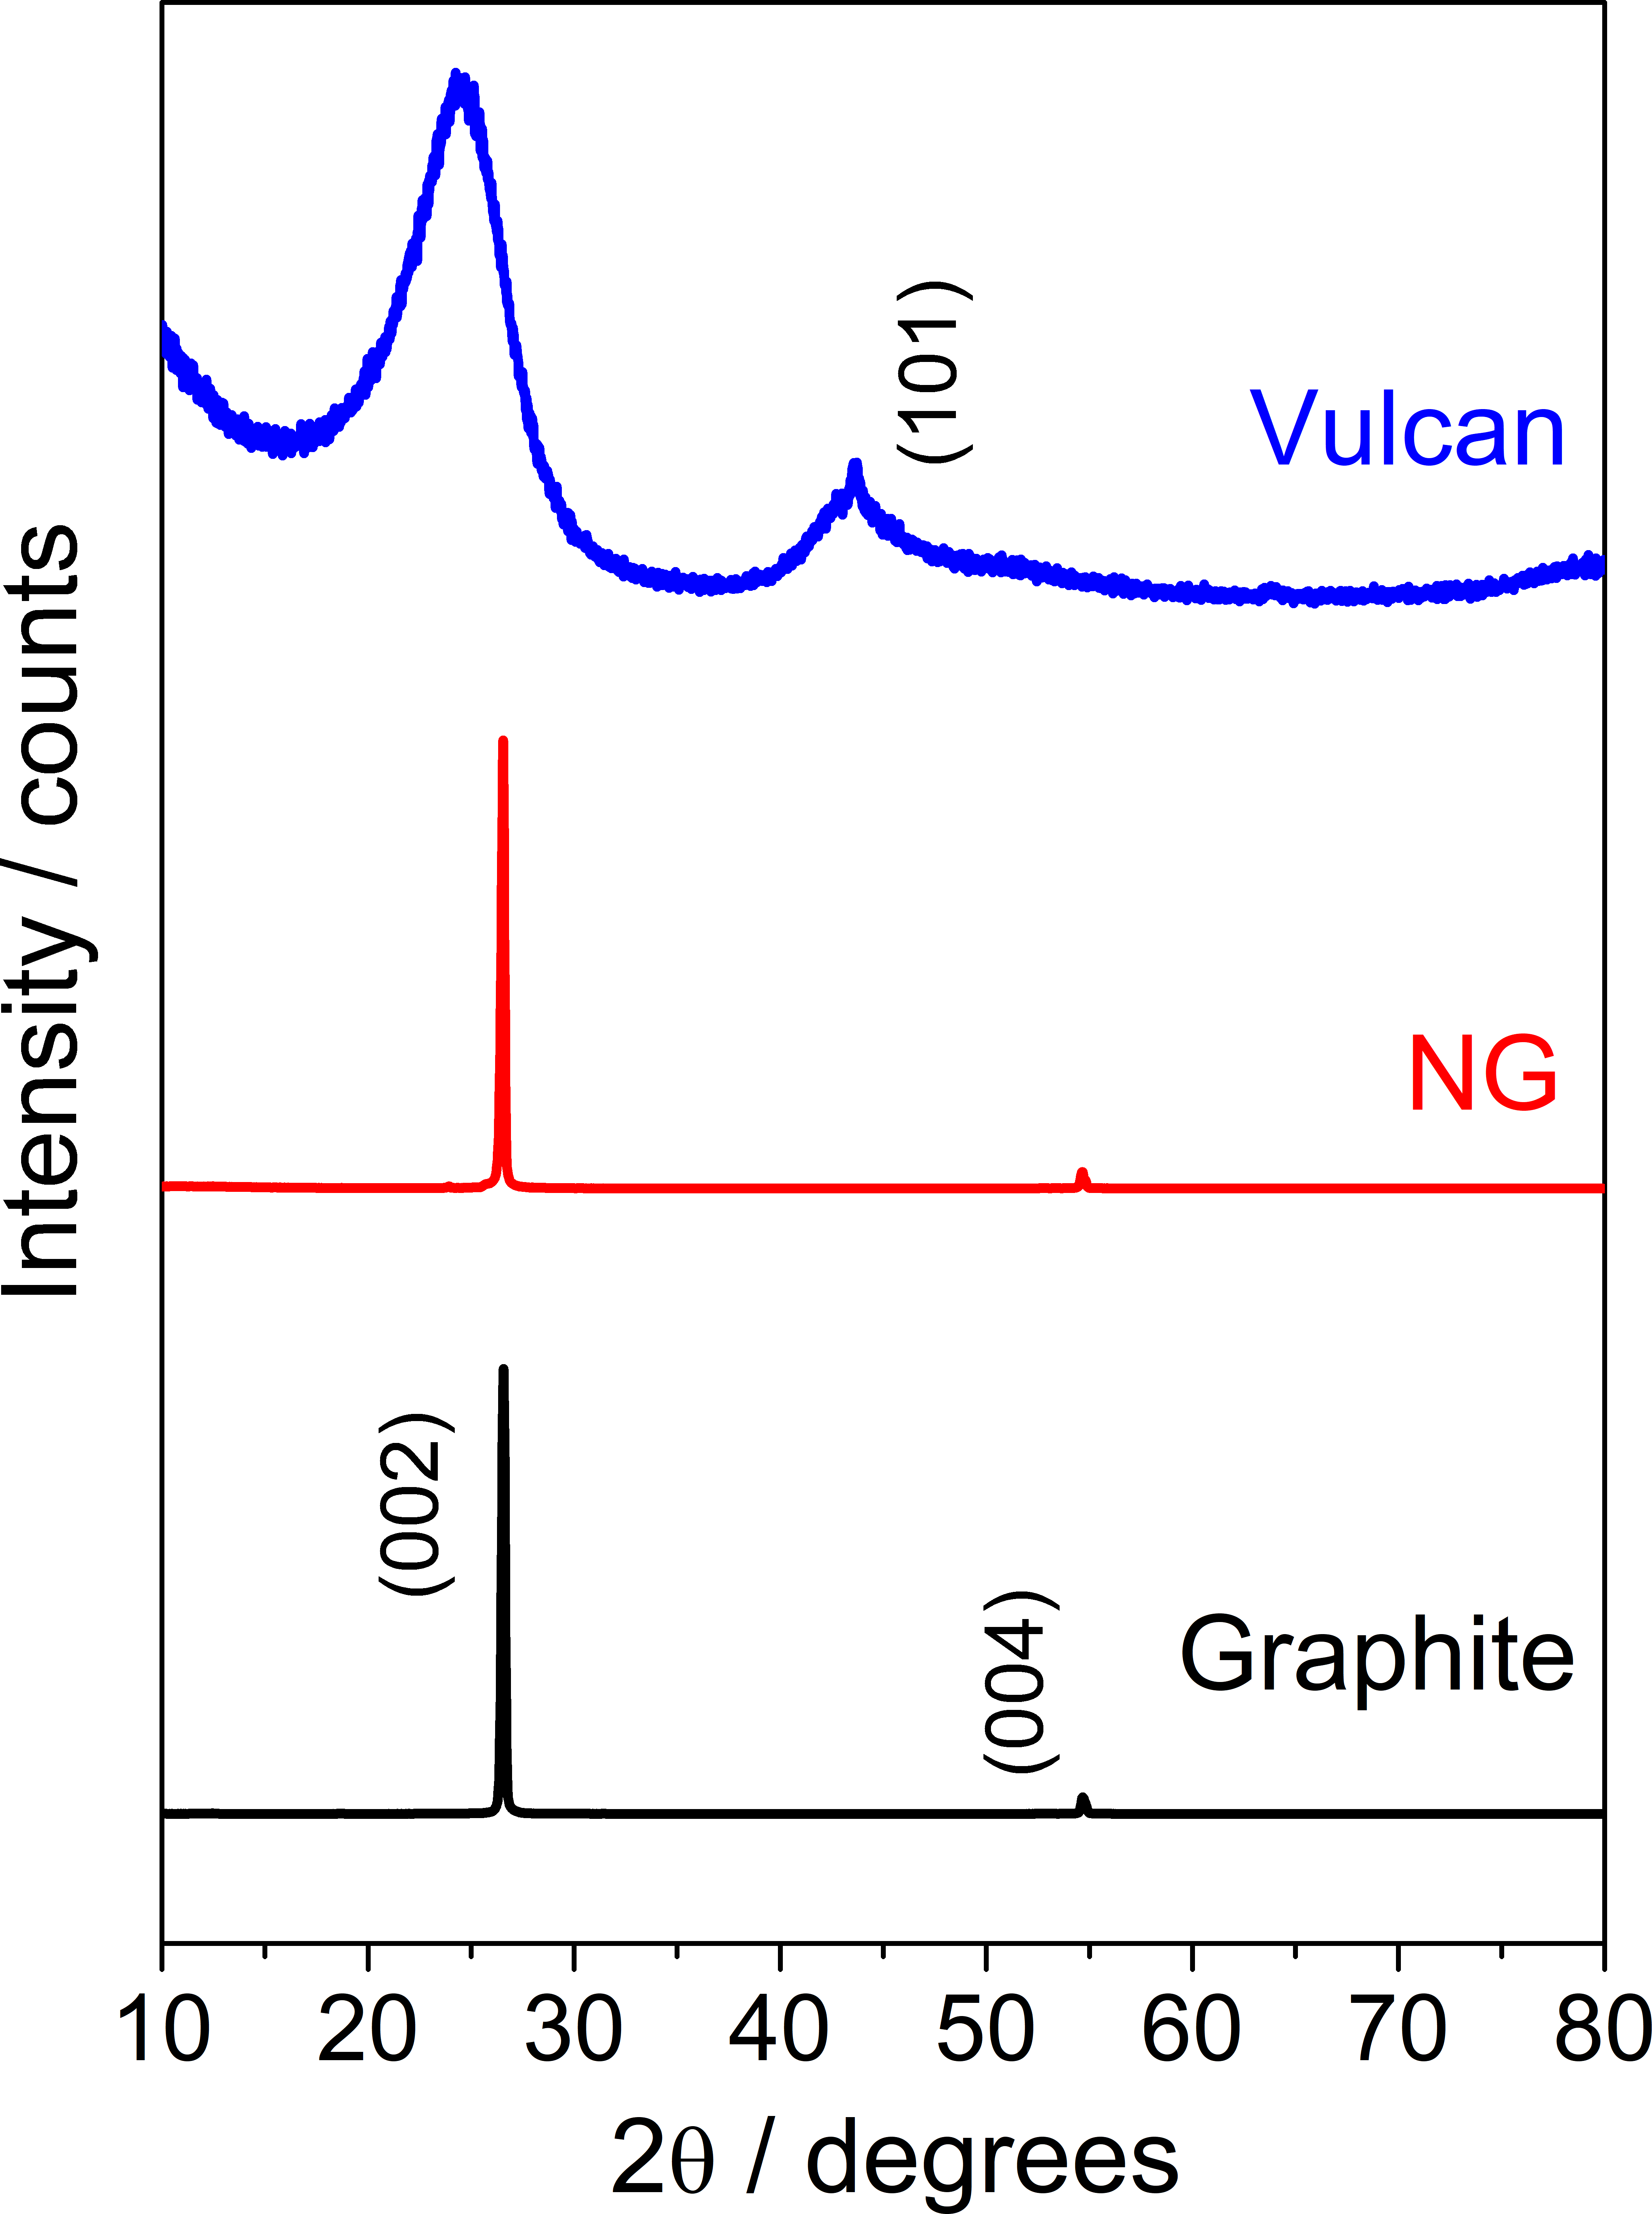


Figure S1. XRD patterns of the Graphite, NG, and Vulcan.


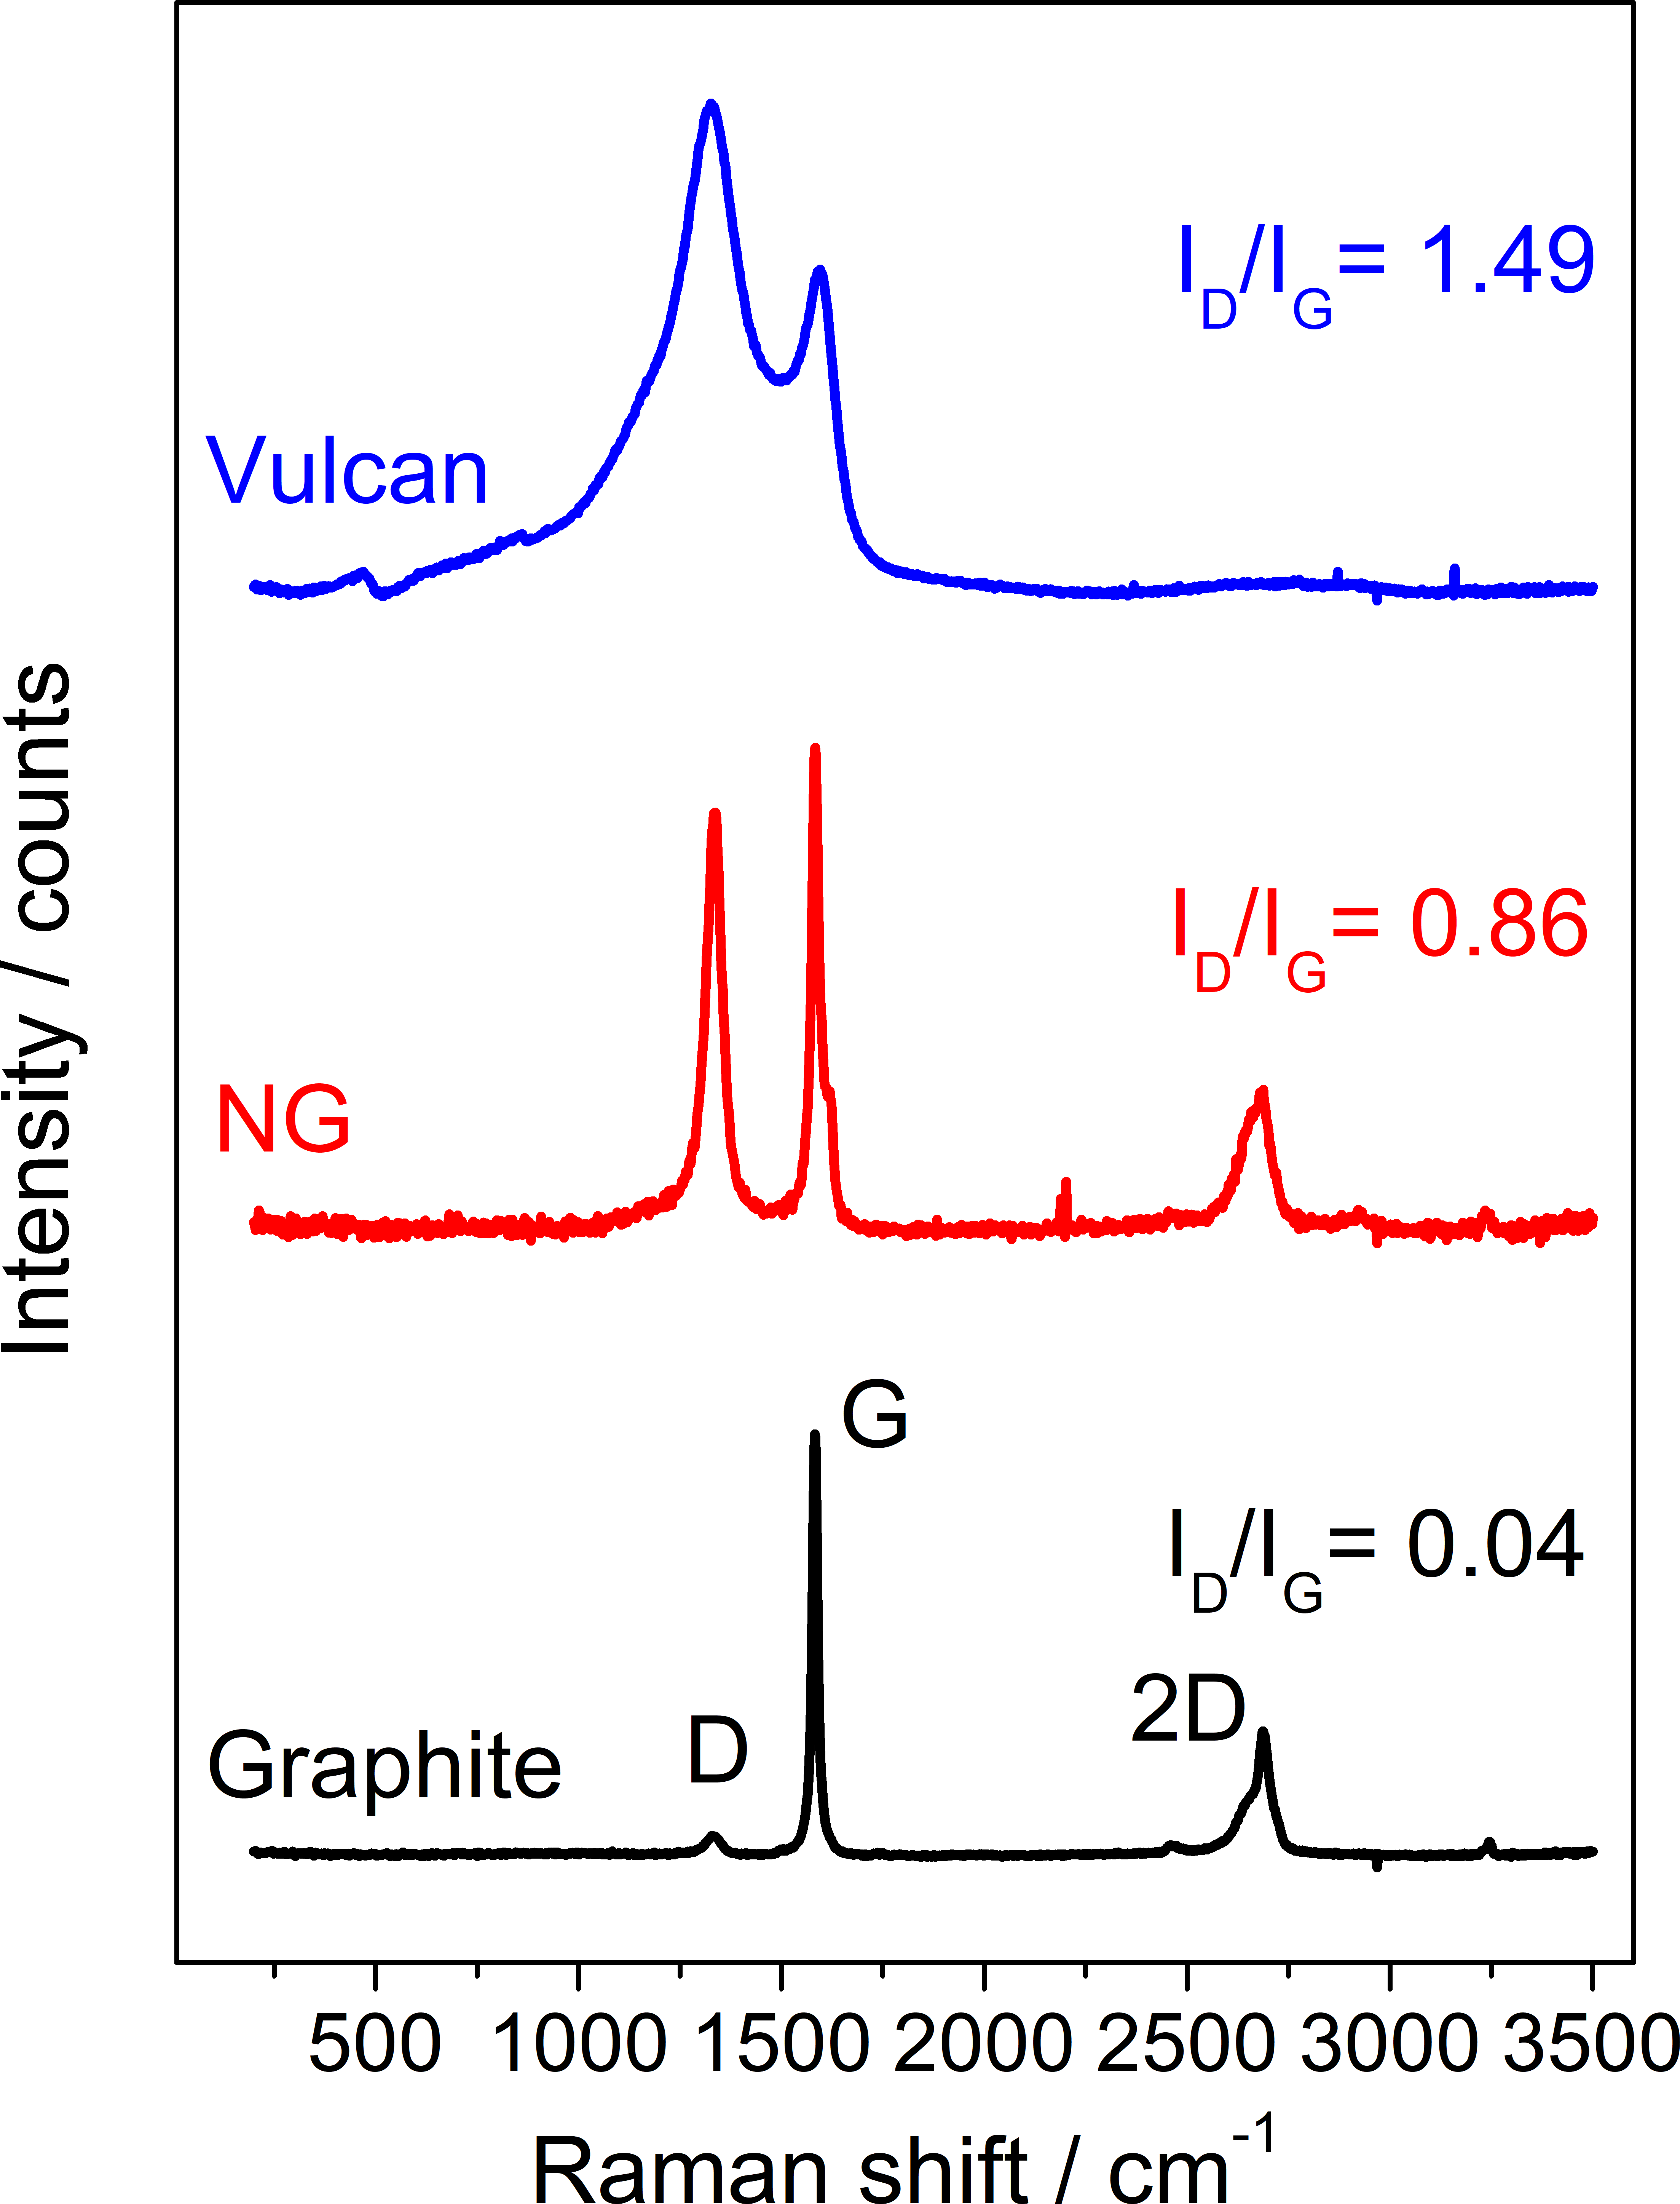


Figure S2. Raman spectra of Graphite, NG, and Vulcan.

Table S1. Surface chemical composition of the nanocatalysts determined by XPS (at. %).

| Nanocatalyst | C 1s | O 1s | Pt 4f | Sn 3d | Pt:Sn |
| --- | --- | --- | --- | --- | --- |
| Pt/C | 95.41 | 3.36 | 1.24 | - | - |
| Pt/NG | 92.24 | 4.78 | 2.96 | - | - |
| Sn@Pt/C | 93.29 | 5.45 | 0.67 | 0.58 | 1.0:0.87 |
| Sn@Pt/NG | 93.0 | 5.33 | 1.02 | 0.66 | 1.0:0.63 |
| - not determined | | | | | |

Table S2. XPS parameters of the nanocatalysts.

| Nanocatalyst | Species | State | B.E.  (eV) | Doublet splitting (eV) | Composition (at. %) |
| --- | --- | --- | --- | --- | --- |
| Pt/C | Pt0 | Pt 4f 7/2 | 71.54 | 3.30 | 0.47 |
|  |  | Pt 4f 5/2 | 74.83 |  | 0.38 |
|  | PtO | Pt 4f 7/2 | 72.55 | 3.12 | 0.23 |
|  |  | Pt 4f 5/2 | 75.67 |  | 0.16 |
|  | C-O  C=O  PtO | O 1s  O 1s  O 1s | 533.59  532.27  530.68 |  | 1.69  1.43  0.24 |
|  | C=C | C 1s | 284.22 |  | 16.22 |
|  | C-C | C 1s | 284.77 |  | 53.23 |
|  | C-OH | C 1s | 285.44 |  | 18.80 |
|  | C-O-C | C 1s | 286.53 |  | 7.16 |
| Pt/NG | Pt0 | Pt 4f 7/2 | 71.42 | 3.30 | 1.18 |
|  |  | Pt 4f 5/2 | 74.72 |  | 0.88 |
|  | PtO | Pt 4f 7/2 | 72.69 | 3.07 | 0.48 |
|  |  | Pt 4f 5/2 | 75.76 |  | 0.42 |
|  | C-O | O 1s | 533.42 |  | 2.18 |
|  | C=O | O 1s | 531.94 |  | 2.03 |
|  | PtO | O 1s | 530.51 |  | 0.57 |
|  | C=C  C-C | C 1s  C 1s | 284.06  284.75 |  | 6.55  67.70 |
|  | C-OH | C 1s | 285.44 |  | 8.76 |
|  | C-O-C | C 1s | 286.15 |  | 9.23 |
| Sn@Pt/C | Pt0 | Pt 4f 7/2 | 71.58 | 3.30 | 0.24 |
|  |  | Pt 4f 5/2 | 74.88 |  | 0.21 |
|  | PtO | Pt 4f 7/2 | 72.69 | 3.23 | 0.13 |
|  |  | Pt 4f 5/2 | 75.92 |  | 0.09 |
|  | C-O | O 1s | 533.76 |  | 1.98 |
|  | C=O | O 1s | 532.16 |  | 2.97 |
|  | PtO | O 1s | 530.64 |  | 0.50 |
|  | C=C  C-C | C 1s  C 1s | 284.01  284.75 |  | 10.64  52.33 |
|  | C-OH | C 1s | 285.35 |  | 17.72 |
|  | C-O-C | C 1s | 286.35 |  | 12.60 |
|  | Sn2+ | Sn 3d 3/2  Sn 3d 5/2 | 496.00  487.59 |  | 0.34  0.24 |
| Sn@Pt/NG | Pt0 | Pt 4f 7/2 | 71.41 | 3.37 | 0.38 |
|  |  | Pt 4f 5/2 | 74.78 |  | 0.38 |
|  | PtO | Pt 4f 7/2 | 72.56 | 3.73 | 0.17 |
|  |  | Pt 4f 5/2 | 76.29 |  | 0.09 |
|  | C-O | O 1s | 533.55 |  | 1.88 |
|  | C=O | O 1s | 532.10 |  | 2.82 |
|  | PtO | O 1s | 530.76 |  | 0.63 |
|  | C=C  C-C | C 1s  C 1s | 284.16  284.77 |  | 7.34  60.81 |
|  | C-OH | C 1s | 285.43 |  | 15.91 |
|  | C-O-C | C 1s | 286.43 |  | 8.94 |
|  | Sn2+ | Sn 3d 3/2  Sn 3d 5/2 | 495.81  487.40 |  | 0.27  0.39 |


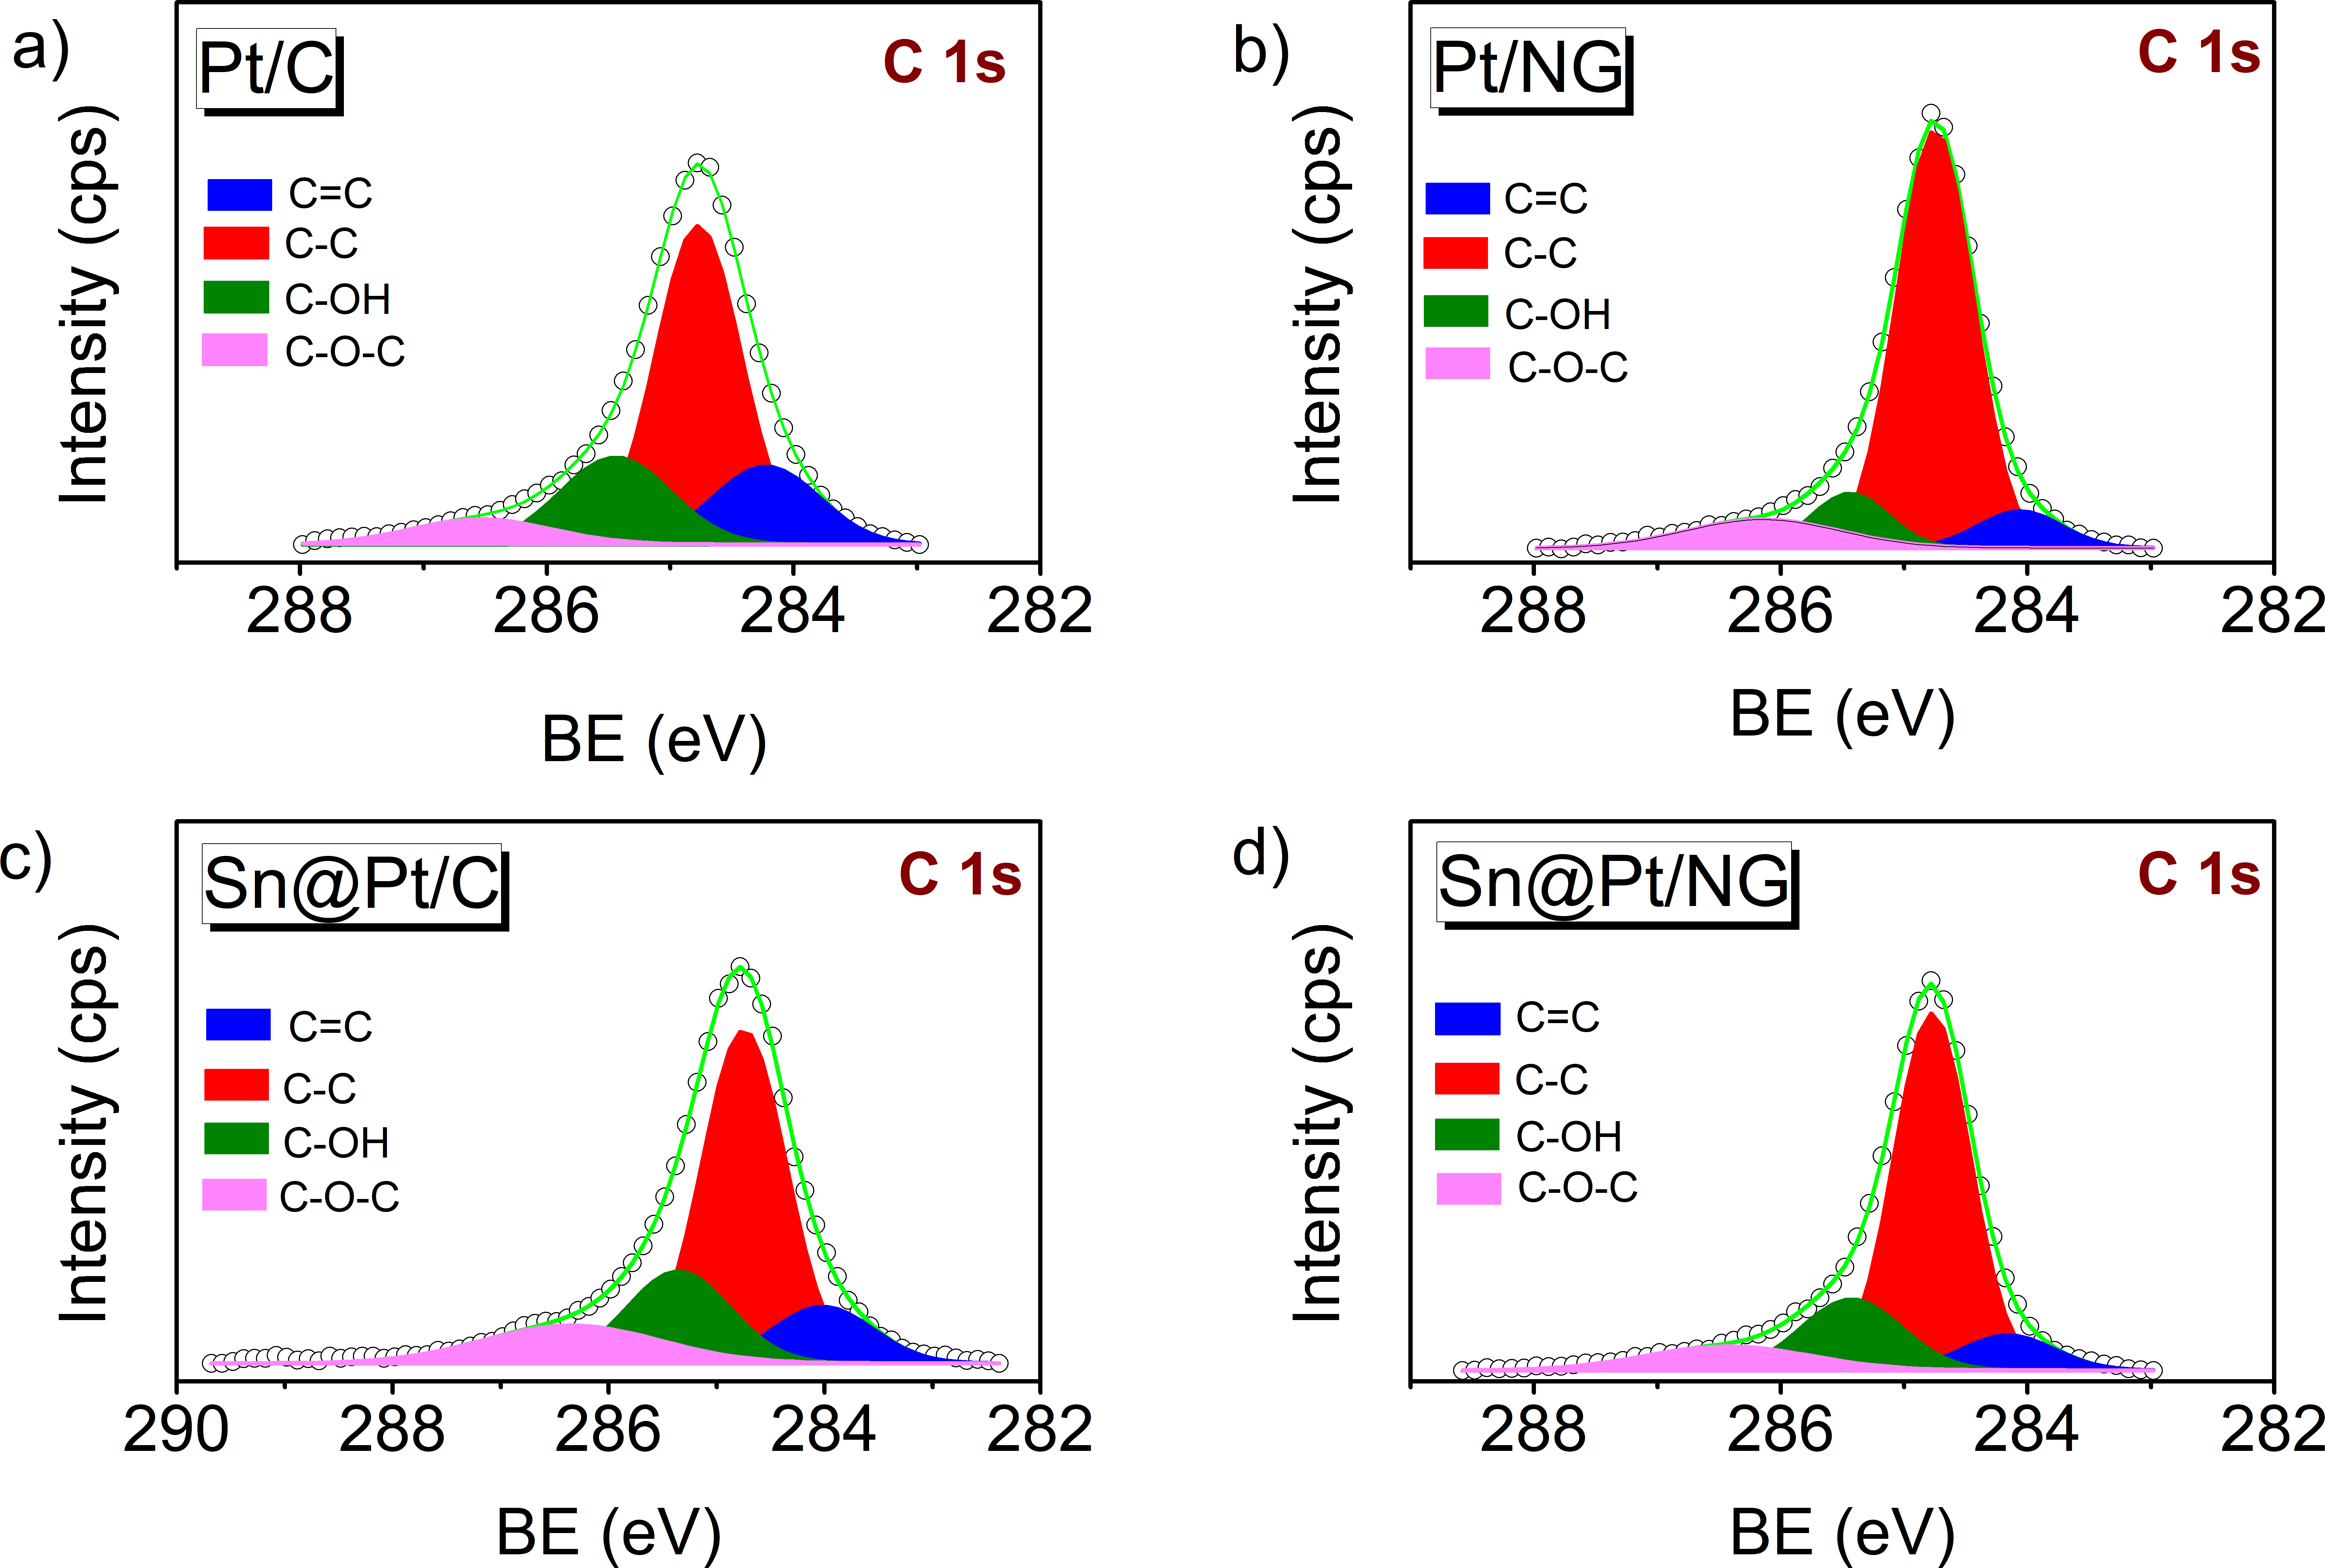


Figure S3. High-resolution spectra in the C 1s region of a) Pt/C, b) Pt/NG, c) Sn@Pt/C, and d) Sn@Pt/NG.


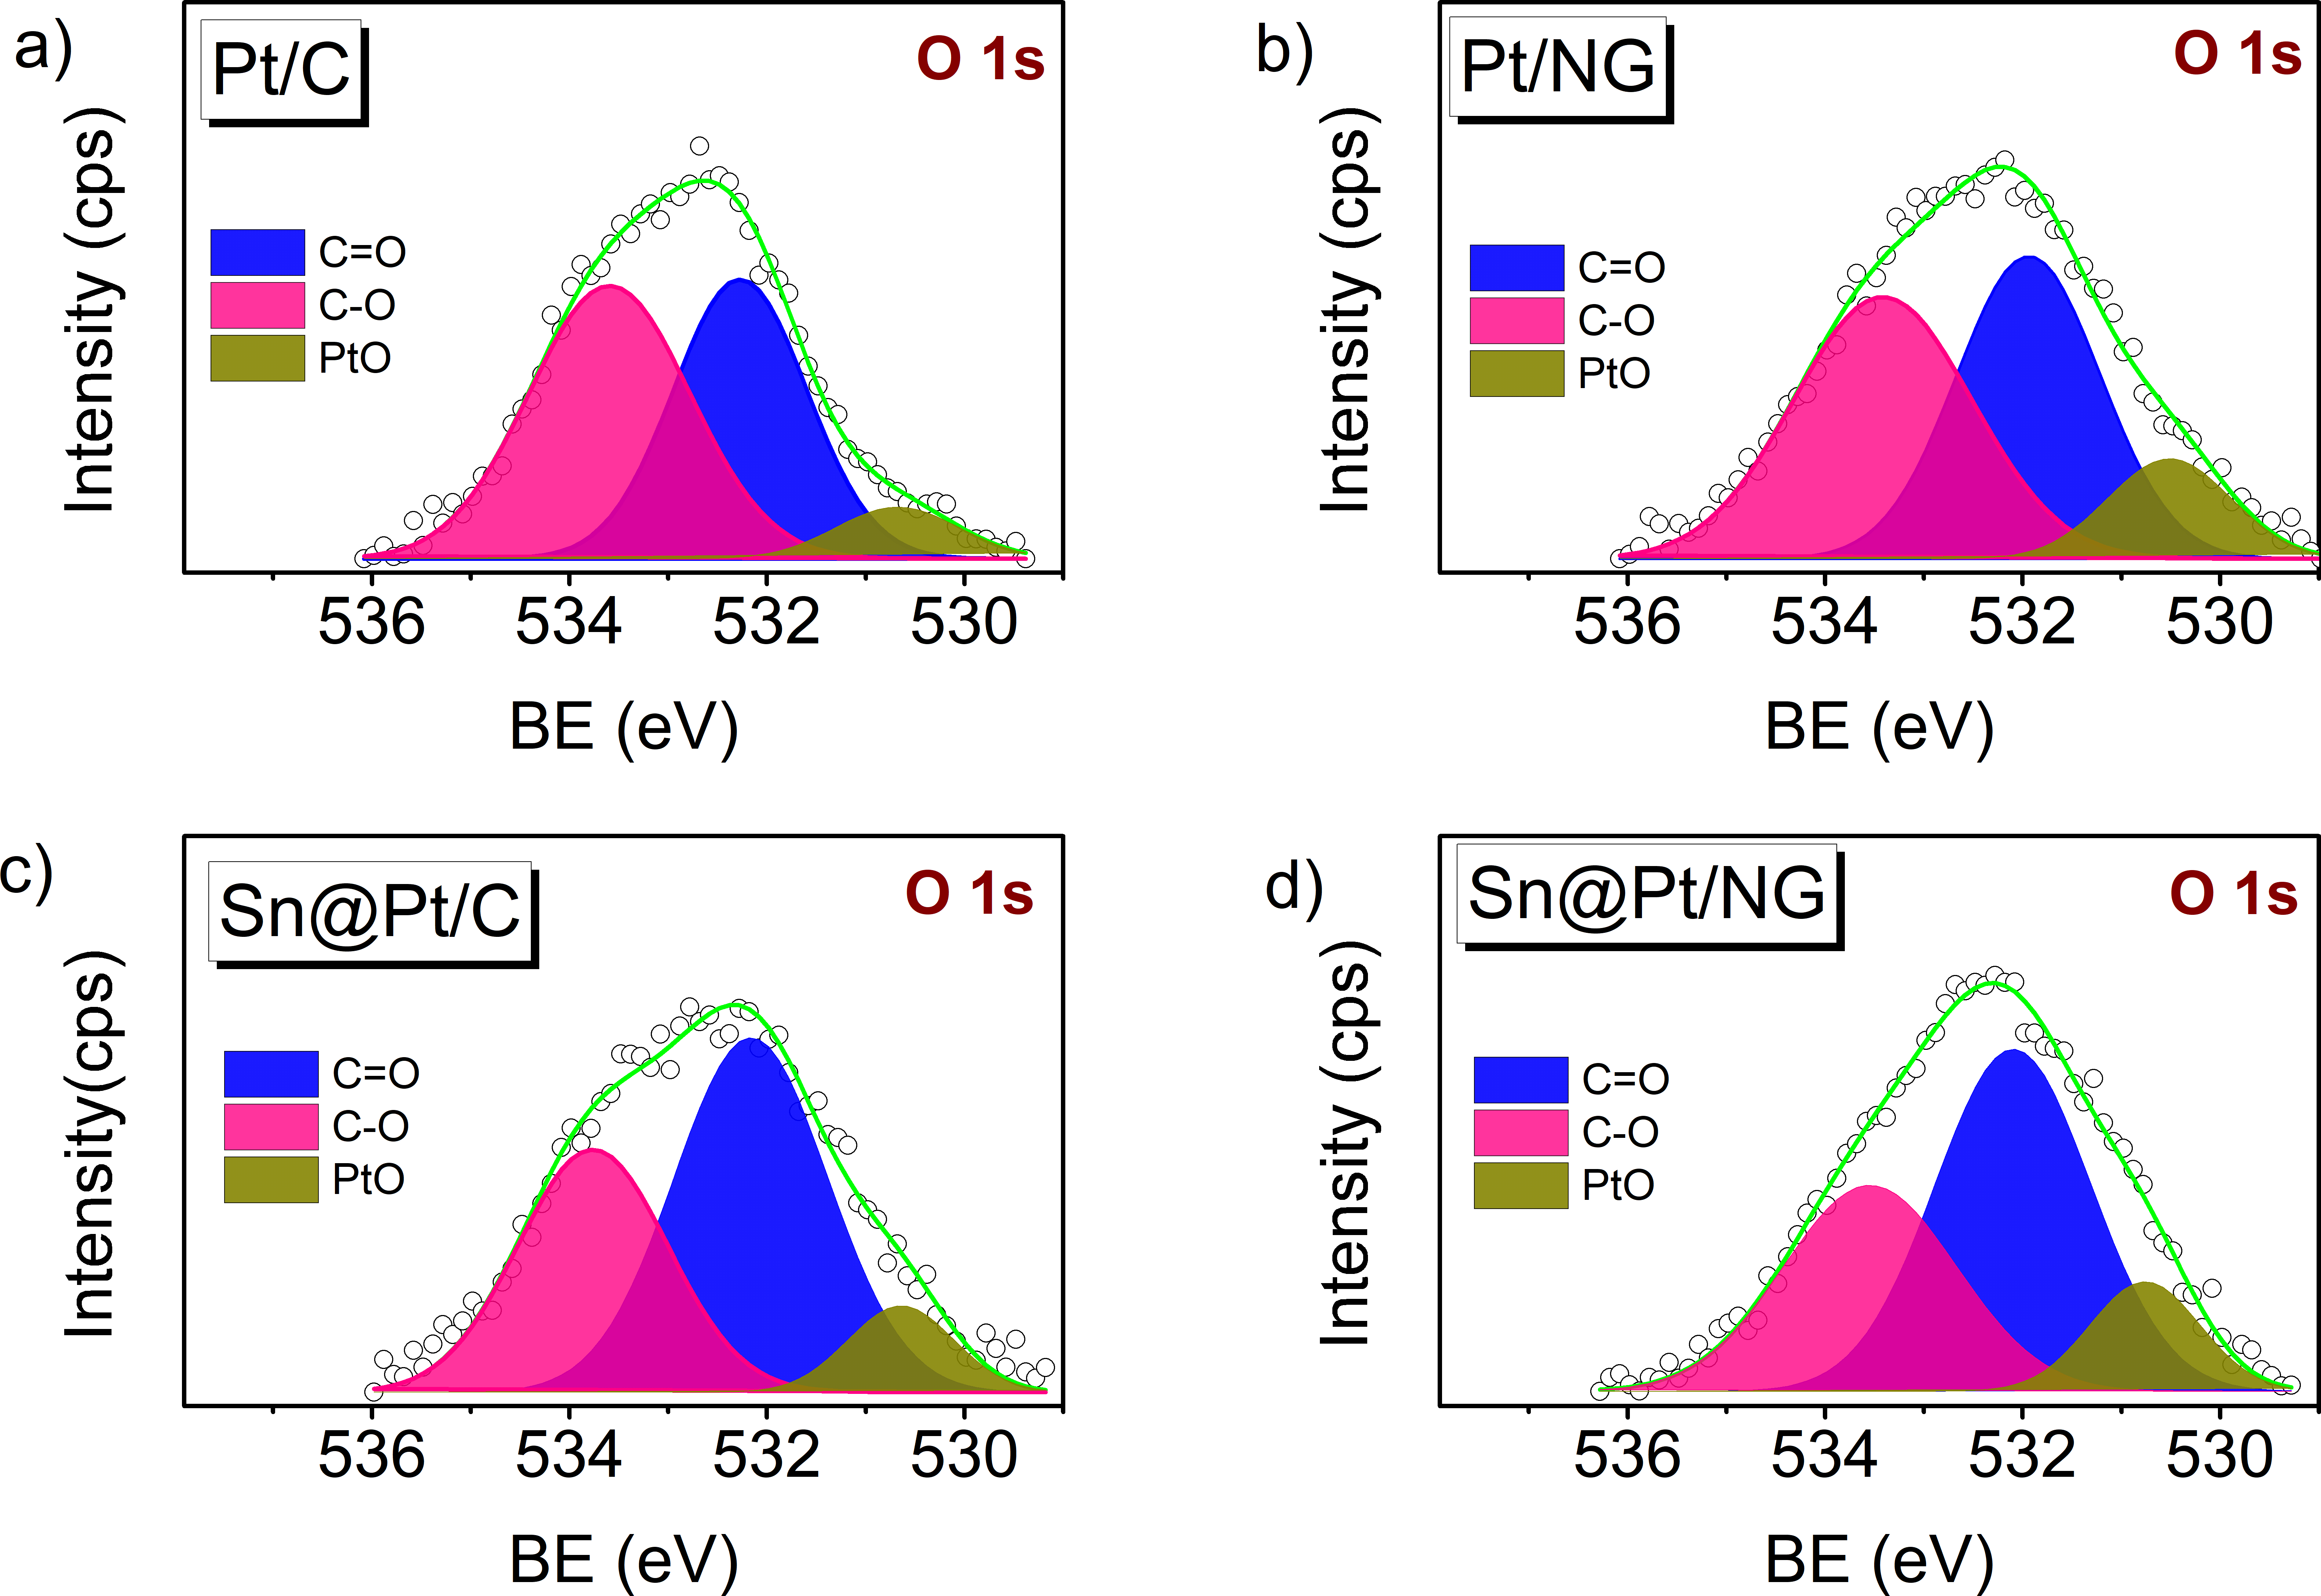


Figure S4. High-resolution spectra in the O 1s region of a) Pt/C, b) Pt/NG, c) Sn@Pt/C, and d) Sn@Pt/NG.


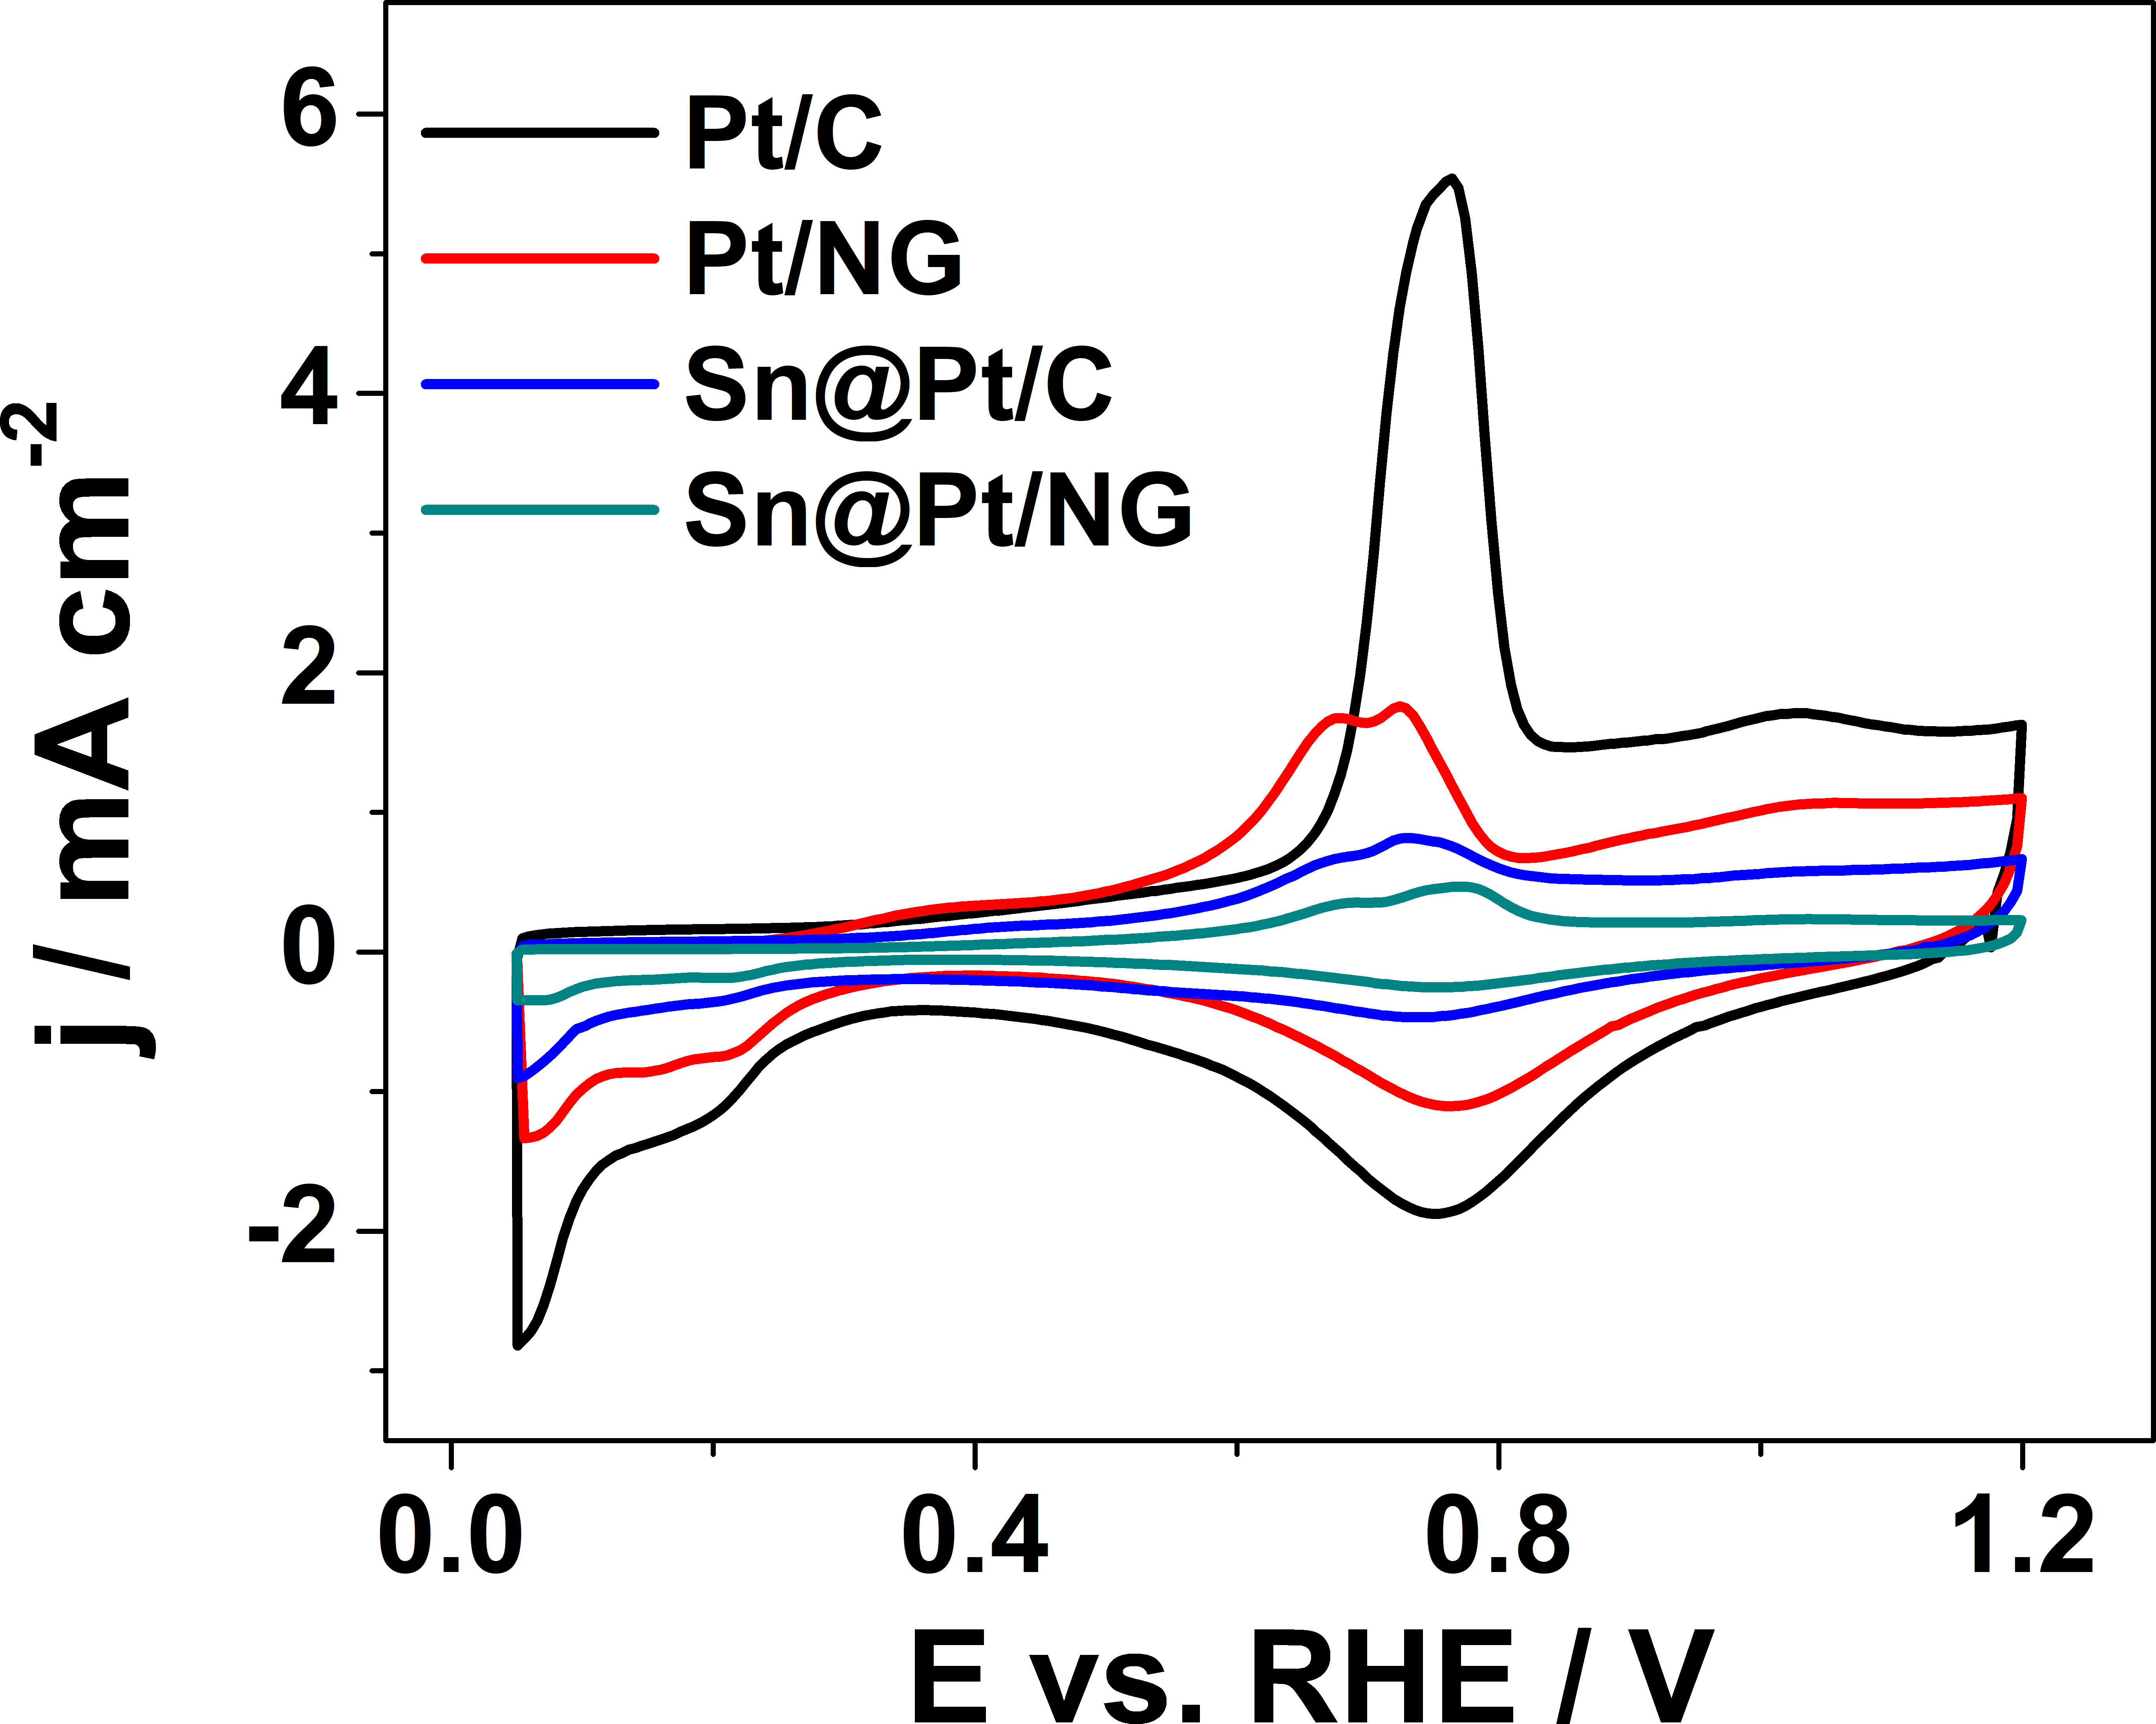


Figure S5. CO-stripping plots of the nanocatalysts. Electrolyte: 0.5 M H2SO4 saturated with CO. CO adsorption time and potential: 10 min at 0.05 V/RHE. Scan rate: 20 mV s-1.


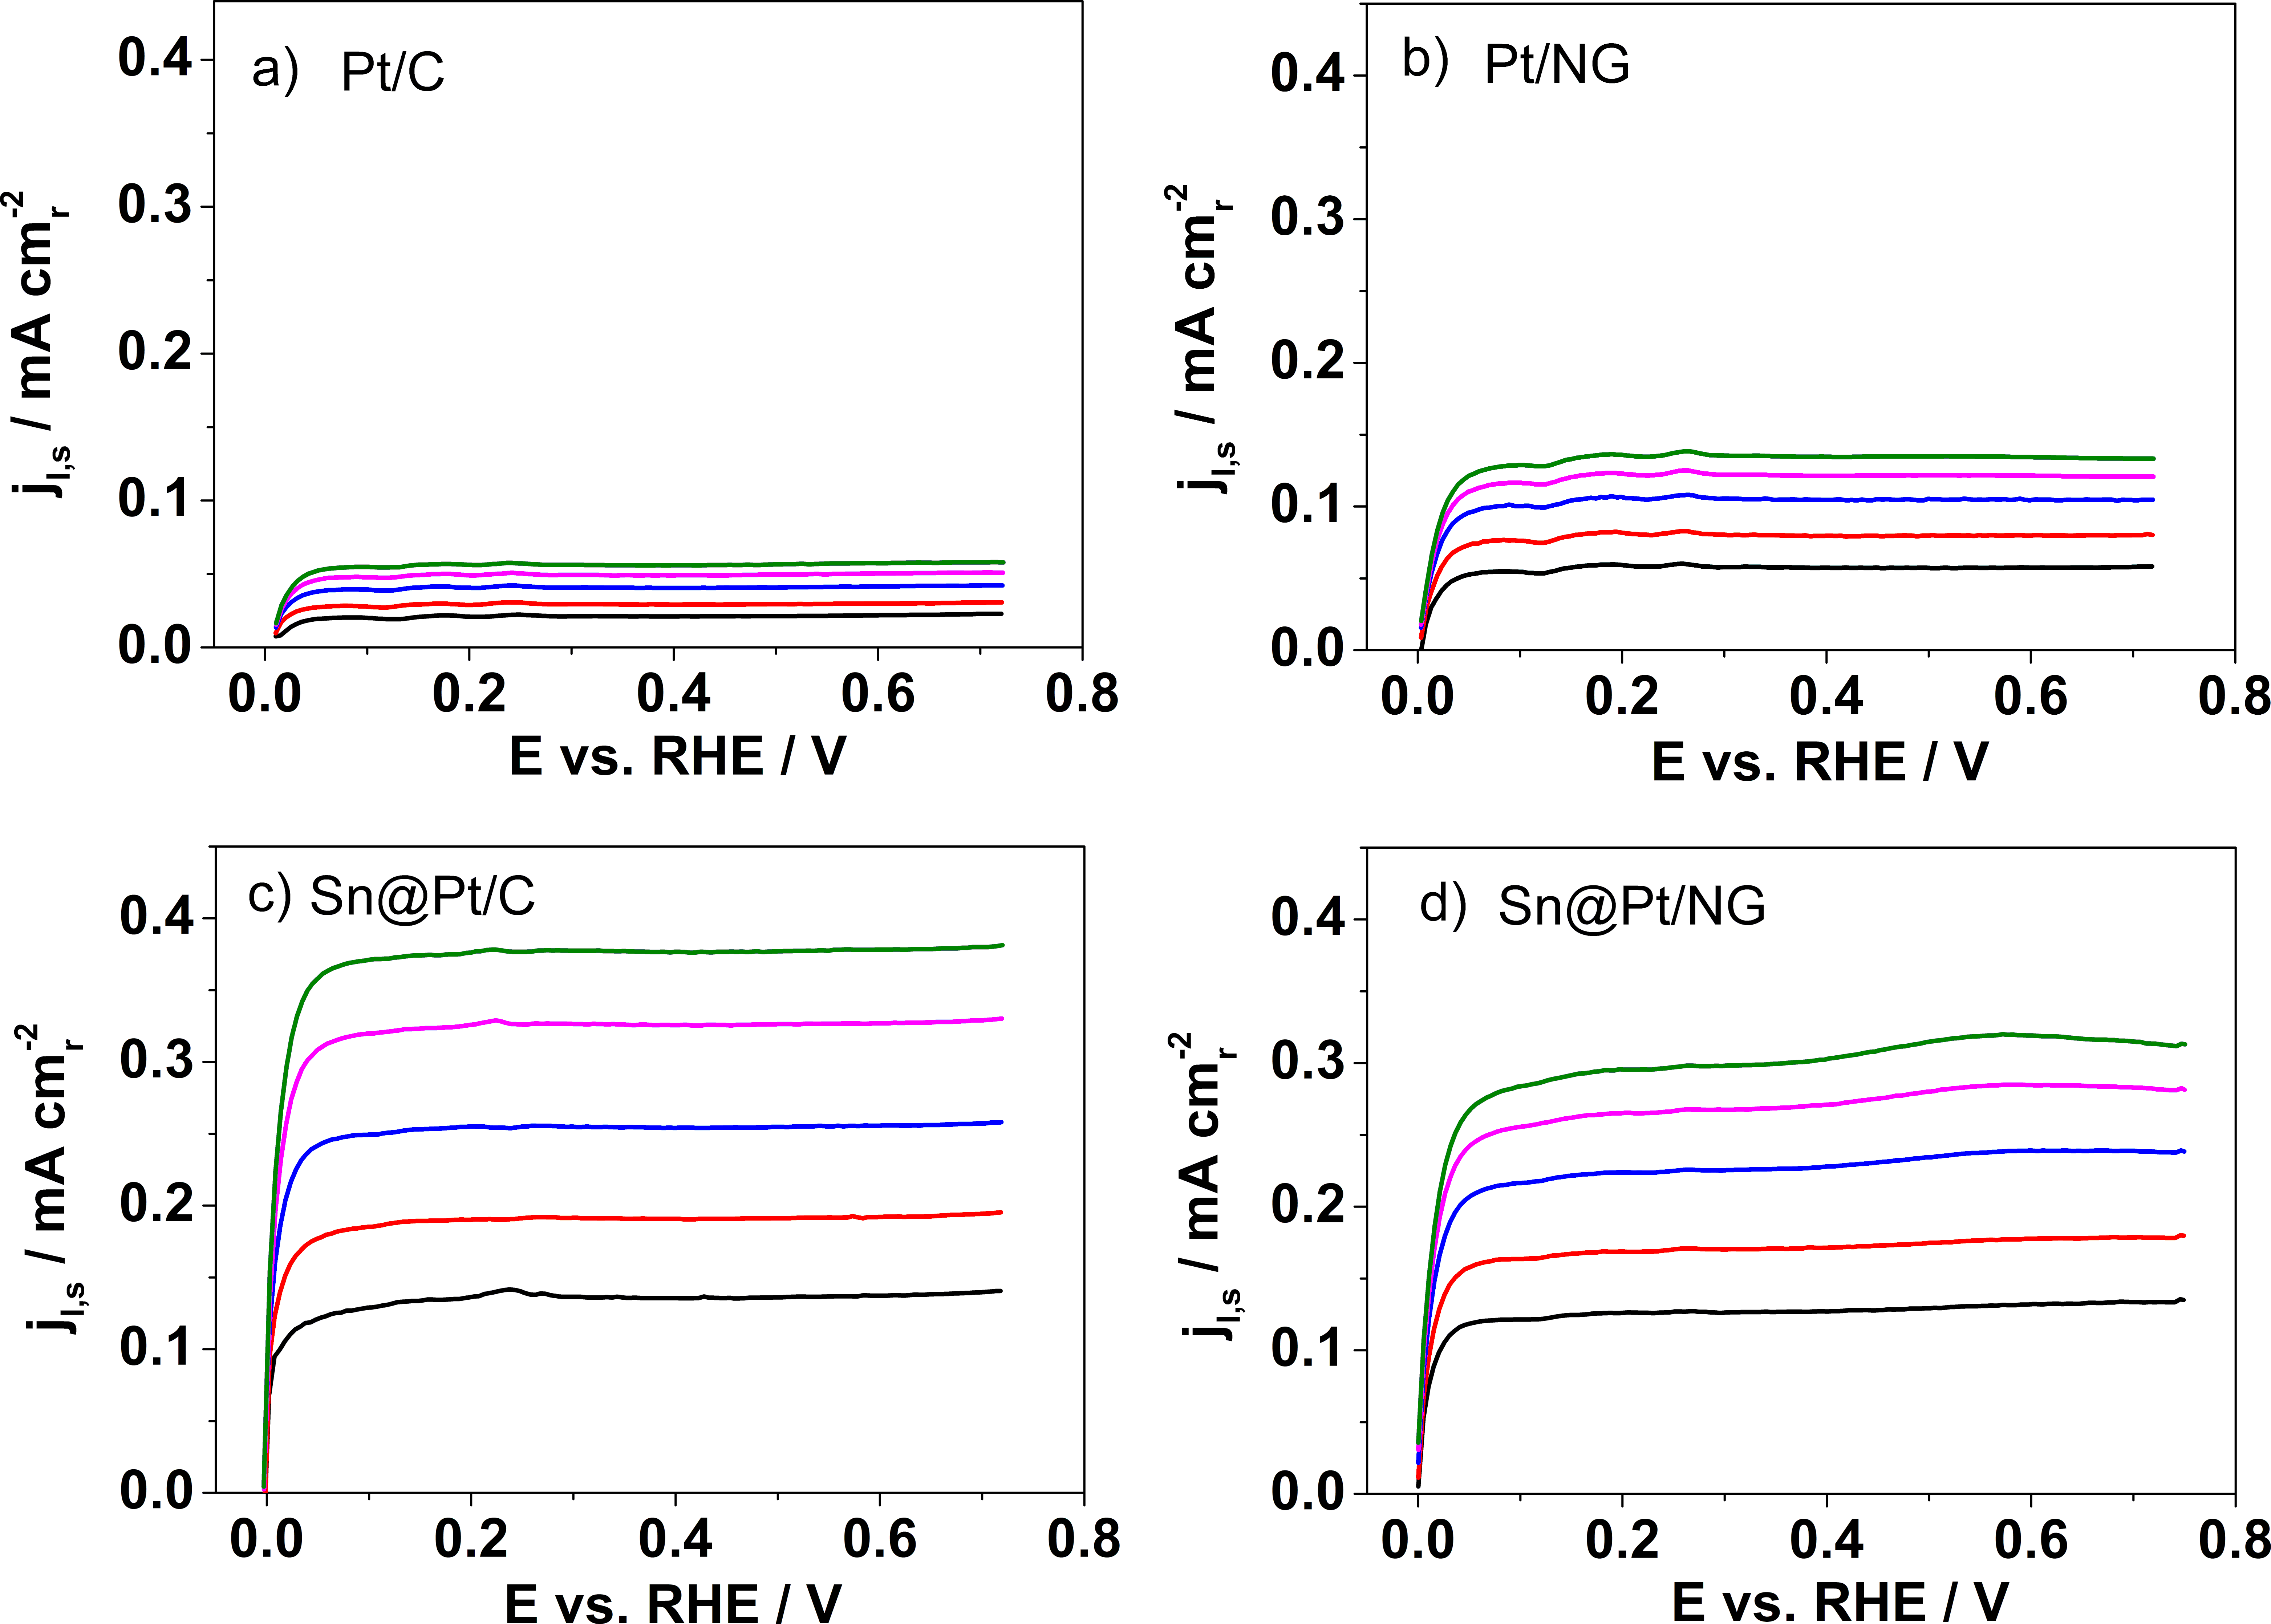


Figure S6. Specific activity of the HOR at a) Pt/C, b) Pt/NG, c) Sn@Pt/C, and d) Sn@Pt/NG. Electrolyte: H2-saturated 0.5 M H2SO4. Scan rate: 5 mV s-1.


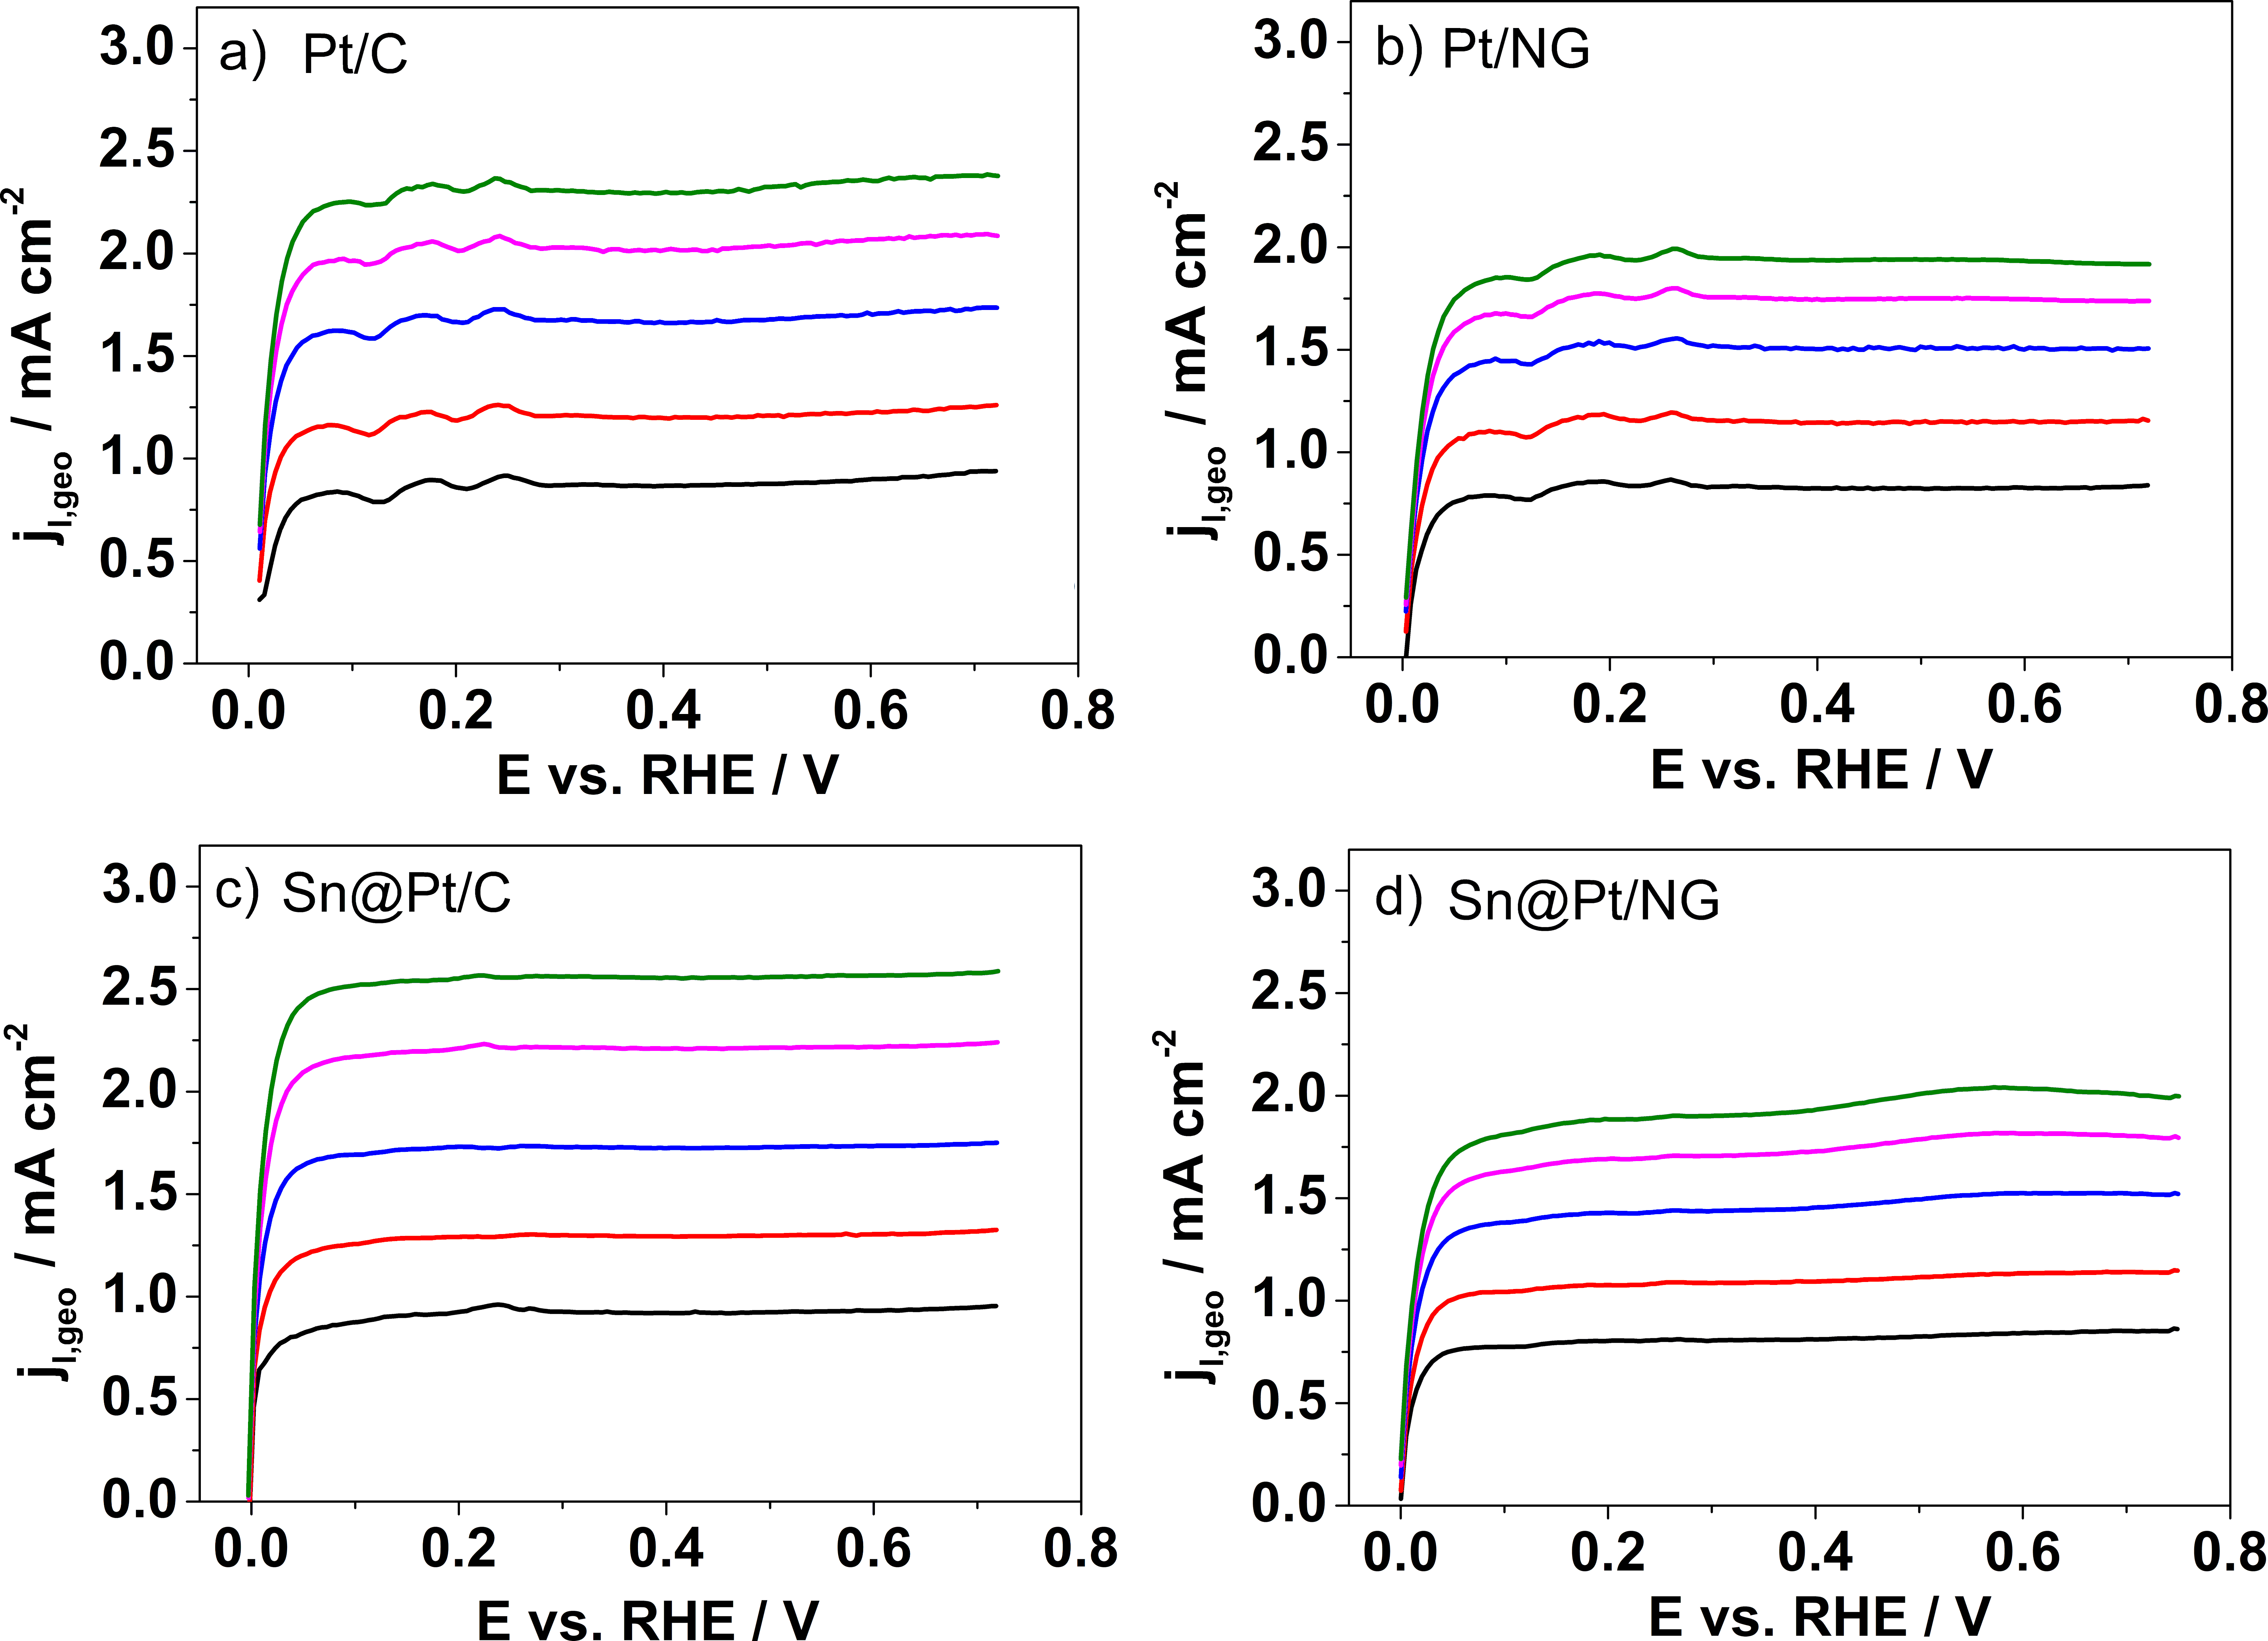


Figure S7. Geometric activity of the HOR at a) Pt/C, b) Pt/NG, c) Sn@Pt/C, and d) Sn@Pt/NG. Electrolyte: H2-saturated 0.5 M H2SO4. Scan rate: 5 mV s-1.
